# Supplementary material for: Occurrence, Distribution, and Risk of Organophosphate Flame Retardants in Sediments from Jiulong River Estuary and Adjacent Western Taiwan Strait, China
Source: MDPI journal article supplement (doi:10.3390/ijerph19042449), 2022-02-20
Supplement: s1 [file s1]

## Supplementary Materials

**Table S1. Structures and physicochemical properties of the target organophosphate flame retardants**

| Compound Name                         | Abbreviation | CAS NO.    | Structure                                                                             | Molecular Formula                                                  | Molecular Weight | Log K <sub>ow</sub> <sup>a</sup> | BCF <sup>a</sup> |
|---------------------------------------|--------------|------------|---------------------------------------------------------------------------------------|--------------------------------------------------------------------|------------------|----------------------------------|------------------|
| 2-Ethylhexyl diphenyl phosphate       | EHDPP        | 1241-94-7  | 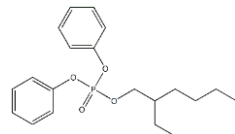   | C <sub>20</sub> H <sub>27</sub> O <sub>4</sub> P                   | 362.4            | 5.73                             | 309.0<br>3       |
| Tris(2,3-dibromopropyl) phosphate     | TDBPP        | 126-72-7   |    | C <sub>9</sub> H <sub>15</sub> Br <sub>6</sub> O <sub>4</sub><br>P | 697.6            | 4.29                             | 3.24             |
| Tris(1,3-dichloroisopropyl) phosphate | TDCPP        | 13674-87-8 |    | C <sub>9</sub> H <sub>15</sub> Cl <sub>6</sub> O <sub>4</sub><br>P | 430.9            | 3.65                             | 12.02            |
| Tris (2-chloroisopropyl) phosphate    | TCPP         | 13674-84-5 |   | C <sub>9</sub> H <sub>18</sub> Cl <sub>3</sub> O <sub>4</sub><br>P | 327.6            | 2.59                             | 7.94             |
| Tris(2-chloroethyl) phosphate         | TCEP         | 115-96-8   |  | C <sub>6</sub> H <sub>12</sub> Cl <sub>3</sub> O <sub>4</sub><br>P | 285.5            | 1.44                             | 1.29             |

Log  $K_{ow}$ : octanol-water partition coefficient; BCF: bioconcentration factor. a. The data are from EPA DSSTox (<https://comptox.epa.gov/>)

**Table S2. Sediment sampling information**

| Regions                                           | Station<br>Name | Latitude | Longitude | Depth<br>(m) | Temperature<br>(°C) | Salinity<br>(ppt) | pH   | Chla<br>(ug/L) | ODO<br>(mg/L) | BGA-PE<br>(μg/L) | TDS<br>(mg/L) | NH <sup>3+</sup> -N<br>(mg/kg) | TOC<br>(mg/kg) | TN<br>(mg/kg) |
|---------------------------------------------------|-----------------|----------|-----------|--------------|---------------------|-------------------|------|----------------|---------------|------------------|---------------|--------------------------------|----------------|---------------|
| Jiulong<br>River<br>Estuar<br>y<br>(JRE,<br>n=16) | A1              | 24.48    | 117.78    | 7.8          | 18.10               | 2.36              | 7.77 | 3.45           | 6.07          | 8.07             | 2866          | 120.51                         | 1279.86        | 154.90        |
|                                                   | A2              | 24.47    | 117.79    | 7.6          | 17.83               | 4.23              | 7.75 | 4.18           | 6.24          | 9.94             | 4954          | 108.61                         | 1158.20        | 129.28        |
|                                                   | A3              | 24.46    | 117.80    | 11           | 17.58               | 6.57              | 7.64 | 3.97           | 6.56          | 9.60             | 7460          | 105.10                         | 1101.47        | 116.53        |
|                                                   | A4              | 24.49    | 117.82    | 9.3          | 17.36               | 9.34              | 7.72 | 3.41           | 6.93          | 9.53             | 10337         | 97.45                          | 1195.43        | 130.39        |
|                                                   | A5              | 24.43    | 117.84    | 9.8          | 17.04               | 13.35             | 7.75 | 2.67           | 7.37          | 7.67             | 14366         | 57.51                          | 1166.27        | 109.17        |
|                                                   | A6              | 24.43    | 117.85    | 6.9          | 17.06               | 13.20             | 7.73 | 2.33           | 7.21          | 7.00             | 14215         | 22.93                          | 241.16         | 3.97          |
|                                                   | A7              | 24.41    | 117.88    | 6.9          | 17.18               | 13.88             | 7.79 | 2.77           | 7.32          | 8.30             | 14891         | 62.07                          | 1133.88        | 102.68        |
|                                                   | A8              | 24.41    | 117.89    | 5.8          | 17.31               | 14.06             | 7.75 | 2.65           | 7.35          | 7.86             | 15067         | 18.54                          | 670.16         | 49.33         |
|                                                   | A9              | 24.40    | 117.91    | 5.7          | 17.56               | 15.13             | 7.80 | 2.84           | 7.73          | 7.58             | 16113         | 34.17                          | 711.70         | 52.54         |
|                                                   | A10             | 24.40    | 117.93    | 6.6          | 17.17               | 17.91             | 7.98 | 2.41           | 7.83          | 6.41             | 18797         | 119.54                         | 1208.42        | 127.23        |
|                                                   | A11             | 24.40    | 117.97    | 7.2          | 17.04               | 21.05             | 7.99 | 1.86           | 7.99          | 5.78             | 21777         | 10.03                          | 842.85         | 62.26         |
|                                                   | A12             | 24.41    | 118.00    | 9.5          | 16.95               | 23.17             | 8.02 | 2.04           | 8.11          | 5.59             | 23766         | 18.03                          | 903.66         | 101.76        |
|                                                   | A13             | 24.42    | 118.03    | 10.0         | 16.84               | 25.66             | 8.04 | 1.82           | 8.1           | 5.50             | 26067         | 52.02                          | 890.22         | 91.74         |
|                                                   | A14             | 24.42    | 118.06    | 10.5         | 16.66               | 26.62             | 8.05 | 1.90           | 8.12          | 6.08             | 26947         | 48.19                          | 1327.65        | 95.20         |
|                                                   | B1              | 24.43    | 117.91    | 11.0         | 17.13               | 26.28             | 8.11 | 2.28           | 8.07          | 6.60             | 26632         | 55.35                          | 914.52         | 79.06         |
|                                                   | B2              | 24.45    | 117.93    | 4.5          | 17.24               | 26.61             | 8.11 | 2.13           | 8.16          | 5.84             | 26928         | 24.07                          | 941.82         | 118.74        |
| Western<br>Taiwan<br>Strait<br>(WTS,<br>n=12)     | Q1              | 25.01    | 119.05    | 31.8         | 21.17               | 30.82             | 8.07 | 1.00           | 7.41          | 3.45             | 30747         | 57.37                          | 517.57         | 54.87         |
|                                                   | Q2              | 24.78    | 118.81    | 19           | 21.22               | 30.65             | 8.12 | 1.11           | 7.41          | 3.40             | 30594         | 24.68                          | 512.55         | 63.37         |
|                                                   | Q3              | 24.71    | 118.92    | 31.7         | 21.72               | 31.01             | 8.14 | 1.01           | 7.42          | 3.46             | 30919         | 32.91                          | 174.52         | 16.80         |
|                                                   | Q4              | 24.61    | 119.12    | 57.6         | 23.18               | 33.14             | 8.18 | 1.15           | 7.20          | 4.10             | 32838         | 25.88                          | 224.78         | 36.10         |
|                                                   | Q5              | 24.50    | 119.64    | 47           | 24.74               | 34.42             | NA   | NA             | NA            | NA               | NA            | 24.27                          | 732.88         | 91.56         |

|    |       |        |      |       |       |      |      |      |      |       |       |        |        |
|----|-------|--------|------|-------|-------|------|------|------|------|-------|-------|--------|--------|
| P1 | 25.51 | 120.12 | 51   | 23.17 | 33.95 | NA   | NA   | NA   | NA   | NA    | 23.20 | 561.17 | 74.71  |
| P2 | 25.18 | 119.40 | 24   | 19.85 | 30.17 | NA   | NA   | NA   | NA   | NA    | 16.27 | 843.42 | 117.09 |
| P3 | 25.09 | 119.57 | 34   | 20.38 | 30.68 | NA   | NA   | NA   | NA   | NA    | 15.54 | 684.25 | 88.15  |
| P4 | 25.02 | 119.78 | 76   | 23.31 | 34.08 | NA   | NA   | NA   | NA   | NA    | 16.89 | 192.21 | 28.09  |
| X1 | 24.41 | 118.10 | 16.5 | 22.16 | 30.04 | 7.97 | 1.39 | 6.92 | 5.20 | 30054 | 30.81 | 862.88 | 148.41 |
| X2 | 24.29 | 118.29 | 19   | 20.84 | 31.04 | NA   | NA   | NA   | NA   | NA    | 17.71 | 614.53 | 87.14  |
| X3 | 24.21 | 118.48 | 44   | 21.25 | 32.24 | NA   | NA   | NA   | NA   | NA    | 16.34 | 853.04 | 84.37  |

Cond, TDS, ORP, pH water, DO were measured in the bottom water; Chla was measured in the surface water; pH sediment, TOC, TN, TP were measured in the surface sediment.

**Table S3. LC-MS/MS analytical parameters for determination of the target organophosphate flame retardants**

| Compound | Molar mass<br>(g/mol) | ESI      | Precursor<br>(m/z) | Product<br>(m/z) | Retention time<br>(min) | Cone voltage<br>(V) | Collision voltage<br>(V) | R <sup>2</sup> | S/N    | LOQ   |
|----------|-----------------------|----------|--------------------|------------------|-------------------------|---------------------|--------------------------|----------------|--------|-------|
| EHDPP    | 362.4                 | Negative | 363.1              | 250.9            | 6.52                    | 110                 | 6                        | 0.9995         | 1371.7 | 0.106 |
| TDBPP    | 697.6                 | Negative | 698.6              | 99               | 5.56                    | 150                 | 26                       | 0.9999         | 282.9  | 0.160 |
| TDCPP    | 430.9                 | Negative | 430.9              | 99               | 5.37                    | 145                 | 24                       | 0.9995         | 187.1  | 0.021 |
| TCPP     | 327.6                 | Negative | 327.1              | 99               | 4.98                    | 110                 | 18                       | 0.9957         | 694.9  | 0.043 |
| TCEP     | 285.5                 | Negative | 284.9              | 63.1             | 4.52                    | 130                 | 25                       | 0.9974         | 291.1  | 0.103 |
| d15-TPP  | 342                   | Negative | 342                | 162              | 4.45                    | 155                 | 28                       | 0.9965         | 352.7  | 0.059 |

**Table S4. Acute and chronic HC5 of five OPFRs**

|         |              | TCEP   | TDBPP  | EHDPP  | TCPP   | TDCPP  |
|---------|--------------|--------|--------|--------|--------|--------|
|         |              | (mg/L) | (mg/L) | (mg/L) | (mg/L) | (mg/L) |
| Acute   | EXT2.0       | 2.96   | 0.21   | 0.02   | -      | 0.52   |
|         | Sigmaplot3.0 | 3.74   | 0.18   | 0.05   | -      | 0.58   |
| Chronic | EXT2.0       | 0.03   | 0.16   | 0.01   | 0.05   | -      |
|         | Sigmaplot3.0 | 0.04   | 0.22   | 0.02   | 0.09   | -      |

('-' means lack of data)

**Table S5. The parameters for health risk assessment.**

|                 | Male | Female |
|-----------------|------|--------|
| IR (L/day)      | 2.23 | 1.65   |
| BW (kg)         | 65   | 56     |
| EF (day year-1) | 365  | 365    |
